# Supplementary material for: Translation, Cross-Cultural Adaptation and Validation of the 10-Item Spine Functional Index (SFI-10) for Greek Patients with Musculoskeletal Spine Disorders
Source: Research Square preprint supplement (doi:10.21203/rs.3.rs-8821715/v1), 2026-02-17
Supplement: Supplementary file 1 [file 1eb831e6495be0865a6c6b0a.docx]

Supplementary Material

**ΟΣΦΥΪΚΗ ΜΟΙΡΑ ΣΠΟΝΔΥΛΙΚΗΣ ΣΤΗΛΗΣ**

**ΔΕΙΚΤΗΣ ΛΕΙΤΟΥΡΓΙΚΟΤΗΤΑΣ ΣΠΟΝΔΥΛΙΚΗΣ ΣΤΗΛΗΣ (SFI-10)**

**HM/NIA:**

**ONΟΜ/MO: ΤΡΑΥΜΑΤΙΣΜΟΣ**

**ΑΥΧΕΝΙΚΗ ΜΟΙΡΑ ΣΠΟΝΔΥΛΙΚΗΣ ΣΤΗΛΗΣ ΘΩΡΑΚΙΚΗ ΜΟΙΡΑ ΣΠΟΝΔΥΛΙΚΗΣ ΣΤΗΛΗΣ**

ΠΑΡΑΚΑΛΩ ΣΥΜΠΛΗΡΩΣΤΕ ΟΛΑ ΤΑ ΜΕΡΗ - Κάθε μέρος βαθμολογείται ξεχωριστά:

Το πρόβλημα στη σπονδυλική σας στήλη (ράχη/μέση/αυχένας) μπορεί να σας δυσκολεύει να κάνετε κάποια πράγματα που κάνετε συνήθως. Αυτός ο κατάλογος περιέχει προτάσεις που χρησιμοποιούν τα άτομα για να περιγράψουν τον εαυτό τους όταν έχουν τέτοιου είδους προβλήματα. Σκεφτείτε τον εαυτό σας τώρα ή τις τελευταίες ημέρες. **Εάν ένα στοιχείο σας περιγράφει, σημειώστε το κουτάκι «Εν μέρει» ή «Ναι». Εάν ένα στοιχείο δεν σας περιγράφει, σημειώστε το κουτάκι «ΟΧΙ».**

ΕΞΑΙΤΙΑΣ ΤΗΣ ΡΑΧΗΣ/ΜΕΣΗΣ Ή ΤΟΥ ΑΥΧΕΝΑ ΜΟΥ:

Όχι Εν μέρει Ναι

| 1. Αποφεύγω βαριές δουλειές (π.χ. καθαριότητα, άρση βάρους άνω των 5 ή 10 κιλών, κηπουρική κ.λπ.). |
| --- |
| 1. Έχω πόνο/πρόβλημα σχεδόν συνέχεια. |
| 1. Δυσκολεύομαι να ανταποκριθώ στα συνήθη καθήκοντα και τις δουλειές του σπιτιού ή της οικογένειας. |
| 1. Δεν κοιμάμαι καλά. |
| 1. Χρειάζομαι βοήθεια με την προσωπική φροντίδα (π.χ. πλύσιμο και υγιεινή). |
| 1. Οι συνήθεις καθημερινές μου δραστηριότητες (εργασία, κοινωνικές επαφές) επηρεάζονται. |
| 1. Χρειάζομαι βοήθεια ή είμαι πιο αργός/ή στο ντύσιμο. |
| 1. Έχει επηρεαστεί το κάθισμά μου. |
| 1. Στέκομαι όρθιος μόνο για μικρά χρονικά διαστήματα. |
| 1. Δυσκολεύομαι να φτάσω κάτω/να σκύψω (π.χ. να μαζέψω πράγματα, να βάλω κάλτσες). |

**SFI ΣΚΟΡ: Προσθέστε τα σημειωμένα κουτάκια:**

**ΣΥΝΟΛΟ (Πόντοι SFI) 100 - (ΣΥΝΟΛΟ x 10) =**

**MDC (90% Αξιοπιστία):** 6.46% ή 1.61 πόντοι SFI. Αλλαγή μικρότερη από αυτή, μπορεί να οφείλεται σε σφάλμα.

**%**

Αριθμητική Κλίμακα Αξιολόγησης Πόνου (Numeric Rating Scale - NRS)

Τις τελευταίες ημέρες, σχετικά με **τη Σπονδυλική σας Στήλη**, βαθμολογήστε τη **σοβαρότητα της συνολικής σας κατάστασης**, σε σύγκριση με την κατάσταση πριν τον τραυματισμό σας.

**Σύνολο x 10 = % 0 1 2 3 4 5 6 7 8 9 10**

Κανένας Πόνος Μέτριος Πόνος Μέγιστος Πόνος

SFI-10 © 2010 CP Gabel

SFI-10 - Australia/English

SFI-10_AU1.1_eng-AUori.pdf
